# Supplementary material for: A Phase II Study of Pelareorep (REOLYSIN®) in Combination with Gemcitabine for Patients with Advanced Pancreatic Adenocarcinoma
Source: PubMed Central journal article supplement (PMC6025223; doi:10.3390/cancers10060160), 2018-05-25
Supplement: cancers-10-00160-s001.pdf [file cancers-10-00160-s001.pdf]

## Supplementary Materials: A Phase II Study of Pelareorep (REOLYSIN®) in Combination with Gemcitabine for Patients with Advanced Pancreatic Adenocarcinoma

**Table S1.** Next generation sequencing (NGS) data on available tissue, site of lesion and overall survival.

| Patient # | Genomic Alterations Identified                                                                                               | Specimen Site | OS (months) |
|-----------|------------------------------------------------------------------------------------------------------------------------------|---------------|-------------|
| 0002      | KRAS G12D, CCNE1 amplification, CDKN2A p16INK4a R58 and p14ARF P72L, MYC amplification, TP53 R213, ARID1A loss, SPTA1 R1694H | Pancreas      | 4.6         |
| 0003      | MET amplification, TSC2 A678fs 14, TP53 M237I, ARID1A Q185, CTCF R49C                                                        | H&N node      | 1.2         |
| 0005      | PDGFRB V8231I                                                                                                                | Peritoneum    | 43.3        |
| 0014      | KRAS G12V, TP53 Y220C                                                                                                        | Soft tissue   | 19.7        |
| 0015      | KRAS G12D, ARID1A D1850fs4, CDKN2A/B loss, TP53 R213L, GRIN2A R1022C, PAX5 V26G, SMAD4 loss                                  | Pancreas      | 18.0        |
| 0018      | EGFR R831H                                                                                                                   | Pancreas      | 17.4        |
| 0020      | KRAS G12D, TP53 G266R                                                                                                        | Pancreas      | 3.8         |
| 0021      | AKT2 amplification, KRAS G12D, CDKN2A p16INK4a G67fs79 and p14ARF, R28fs52+, TP53 R273C, ACVR1B E240                         | Pancreas      | 2.5         |
| 0022      | KRAS G12V, NF1 R2517-subclonal, PDGFRA E289K, CDKN2A/B loss                                                                  | Pancreas      | 28.2        |
| 0023      | KRAS G12V, CDKN2A p16INK4a H83Y and p14ARF A97V, p16INK4a R80 and p14ARF P94L, TP53 Y126C, GLI1 P53S, RNF43 Q414             | Liver         | 39.8        |
| 0025      | KRAS G12C, CDKN2A p16INK4a A30_G35del, TP53 R282W, ARID1A G2087R                                                             | Pancreas      | 1.8         |
| 0026      | KRAS G12D, CDKN2A/B loss, RUNX1 P184fs*28                                                                                    | Pancreas      | 29.1        |
| 0027      | KRAS G12D, CDKN2A/B loss, TP53 R248Q, ARID1A deletion exons 12-14, SMAD4 D124fs2                                             | Liver         | 3.8         |
| 0028      | KRAS amplification-equivocal G12D, CDKN2A p16INK4a R99fs10 and p14ARF R115fs9+, TP53 P153fs28                                | Pancreas      | 4.8         |
| 0030      | KRAS G12V, CDKN2A/B loss, TP53 splice site 672+2T>C, PRDMM1 E743K                                                            | Pancreas      | 17.5        |

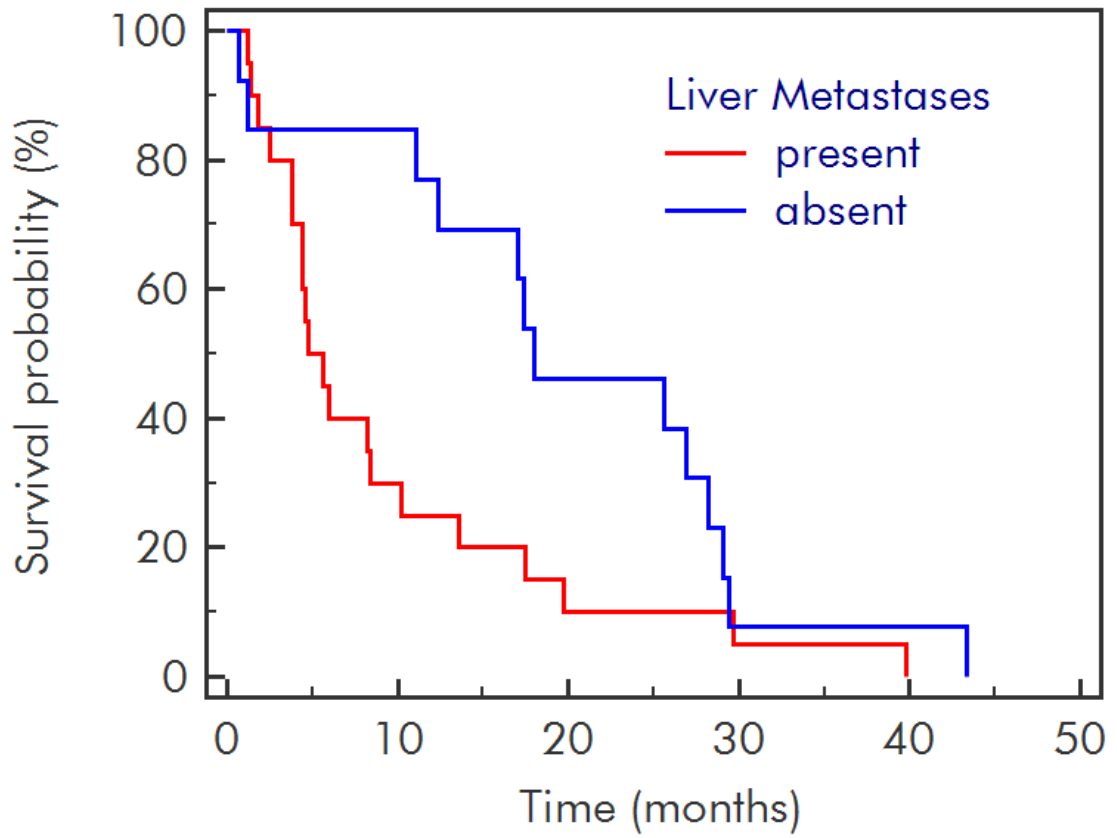

**Figure S1.** Overall survival of patients with advanced pancreatic cancer based on liver metastasis (present vs absent).
